# Supplementary material
Source: PubMed Central journal article supplement (PMC4513247)
Supplement: NIHMS32315-supplement-1.pdf [file NIHMS32315-supplement-1.pdf]

THE HIGH-AFFINITY BINDING SITE FOR TRICYCLIC  
ANTIDEPRESSANTS RESIDES IN THE OUTER VESTIBULE OF THE  
SEROTONIN TRANSPORTER

Subhdeep Sarker, René Weissensteiner, Ilka Steiner, Harald H. Sitte,  
Gerhard F. Ecker, Michael Freissmuth\* and Sonja Sucic

Article submitted to the journal: Molecular Pharmacology

SS, IS, HHS, MF and SS are from the Institute of Pharmacology, Center for Physiology and  
Pharmacology, Medical University of Vienna, Waehringer Strasse 13a, A-1090 Vienna,  
Austria;

RW and GFE are from the Department of Medicinal Chemistry, University of Vienna,  
Althanstrasse 14, 1090 Vienna, Austria

(a) Number of supplementary figures: 5

(b) Number of supplementary tables: 3

## Supplementary Material

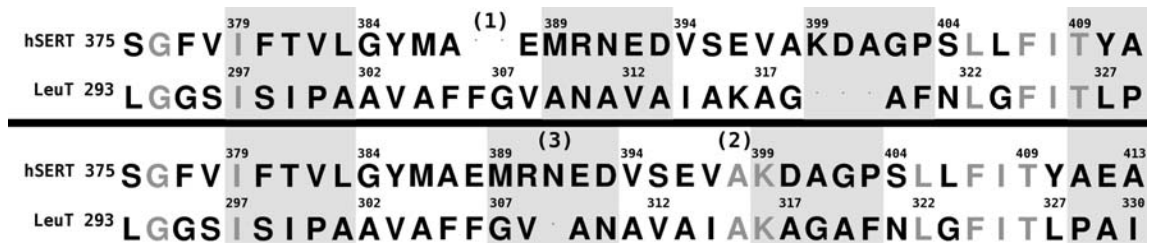

**Supplementary Figure 1:** Changes in the alignment compared to that published by Beuming et al. (Beuming et al. 2006). Upper row shows the original alignment. Bottom row outline the modified alignment. (1) In the query sequence a gap was removed, and (2) a match of A<sup>398</sup> and K<sup>399</sup> with the template was achieved. (3) N<sup>391</sup> was inserted into the template at the end of TM7.

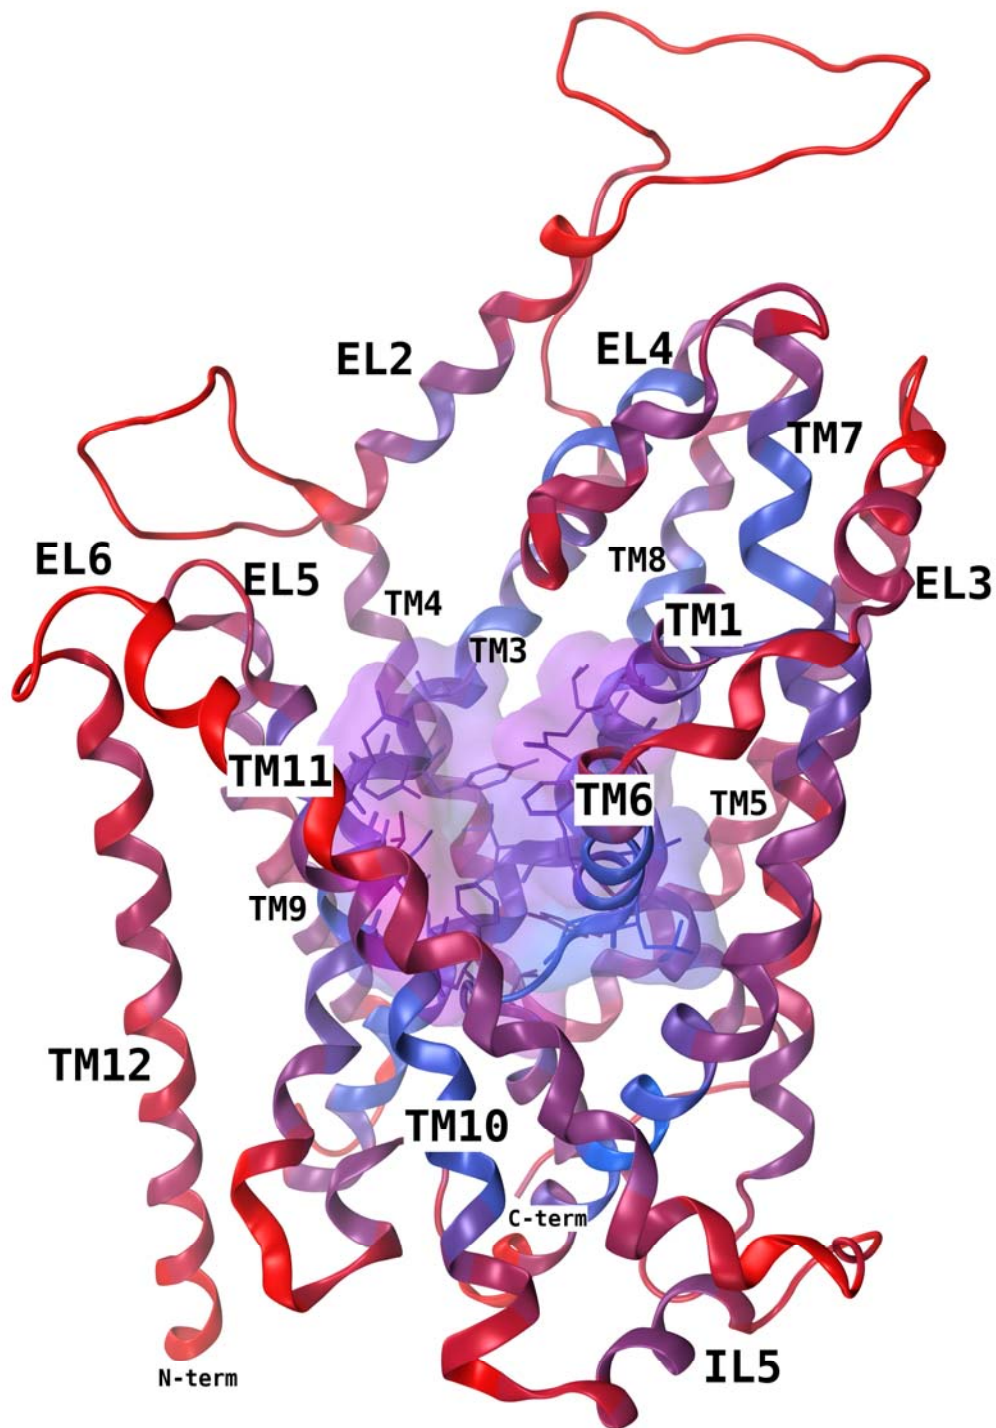

**Supplementary Figure 2:** Homology model of hSERT coloured according to the result of the structural assessment by the QMEAN scoring function. Regions with high accuracy (estimated error < 1 Å) are depicted in blue. The red coloured regions show an estimated error of > 3.5Å. Intermediate residues are depicted in magenta. The defined binding site is represented as transparent surface.

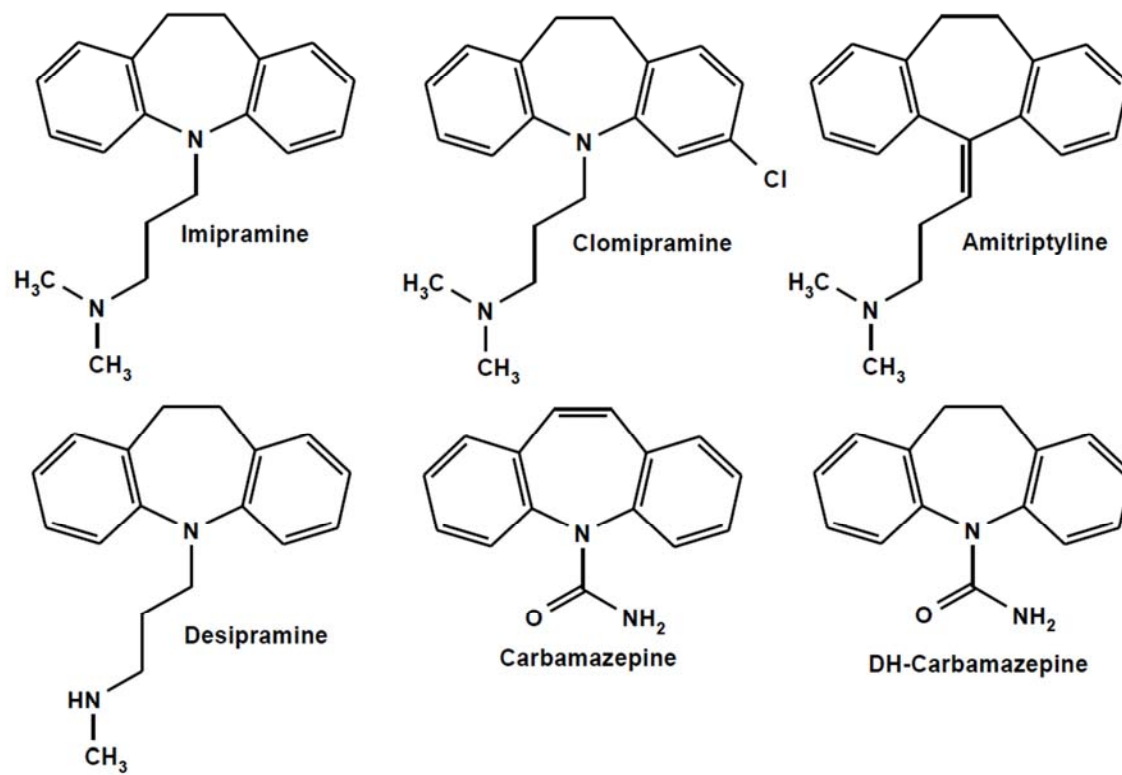

**Supplementary Figure 3:** Chemical structures of compounds used for the docking study.

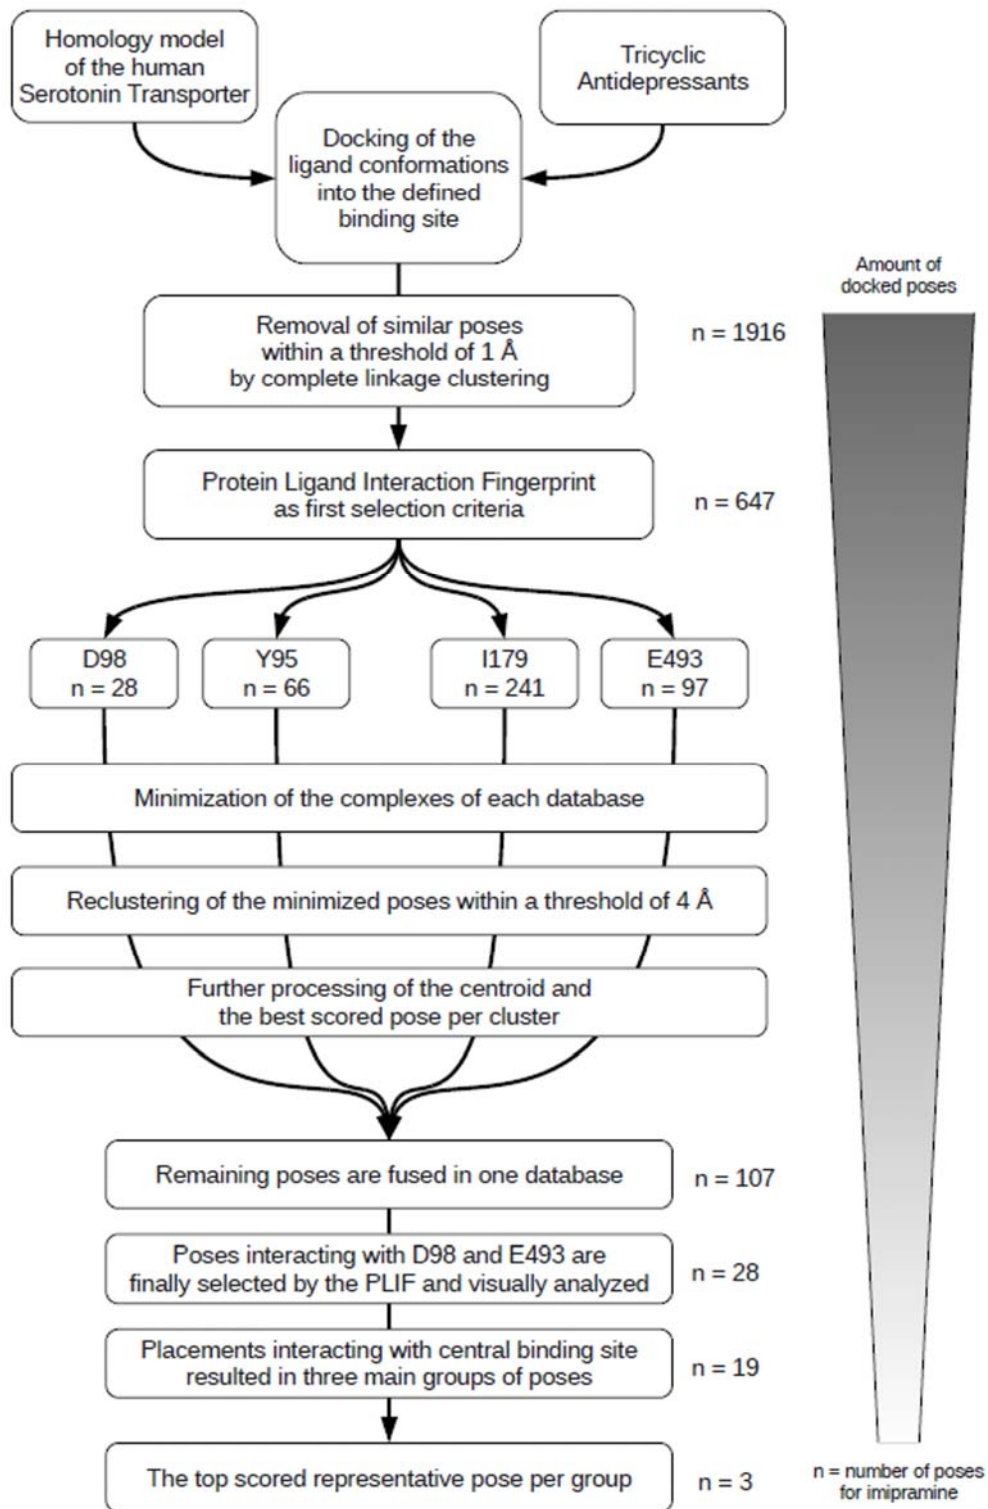

**Supplementary Figure 4:** Protocol of the docking and evaluation procedure depicted as flow chart. The numbers on the right side correspond to the amount of poses of imipramine.



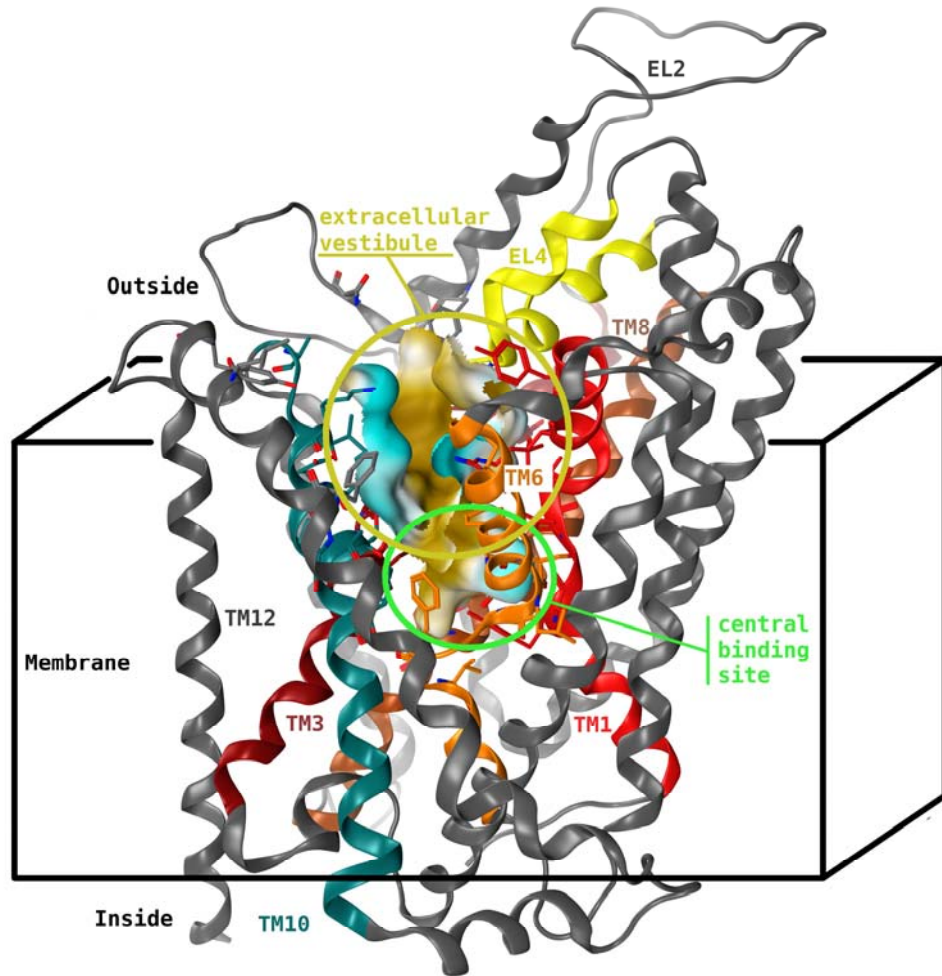

**Supplementary Figure 5:** The homology model of hSERT placed in a schematic membrane shows two distinct binding sites. In the 'open-to-out' conformations both sites are continuous and depicted as hydrophobicity surface (blue = hydrophilic, beige = lipophilic). Green circle: Central substrate binding site in the center of the transporter. Yellow circle: Extracellular vestibule and ligand entry path.



Supplementary Table 1: Mutagenesis studies used for validation of the homology model of hSERT

| Publication       | Residue                                                                      | Criterion                                                                   | fulfilled; comment                               |
|-------------------|------------------------------------------------------------------------------|-----------------------------------------------------------------------------|--------------------------------------------------|
| Andersen et al.   | I179                                                                         | in extracellular vestibule; part of the entrance                            | yes                                              |
|                   | D400                                                                         | in EL4; no effect or slight effect on inhibitor binding                     | yes; orientated towards extracellular medium     |
|                   | S438                                                                         | Important for recognition of substrate and inhibitors; near D98             | yes                                              |
|                   | L486                                                                         | in extracellular vestibule; no effect or slight effect on inhibitor binding | yes                                              |
|                   | V489                                                                         | in extracellular vestibule; no effect or slight effect on inhibitor binding | yes                                              |
|                   | K490                                                                         | in extracellular vestibule; no effect or slight effect on inhibitor binding | no; group 3 shows pi-cation interaction          |
| Barker et al.     | D98                                                                          | important for transporter function; is placed central in binding site 1     | yes; coordinates one Na <sup>+</sup> and Ligands |
| Chen et al.       | I172                                                                         | MTS-accessible from both sites; protected by substrates and inhibitors      | yes; located in central binding site             |
|                   | I179                                                                         | protected only by substrates; may be buried in hydrophobic environment      | partly                                           |
| Field et al.      | T323                                                                         | MTSEA-Biotin accessible                                                     | yes                                              |
|                   | G324                                                                         | MTSEA-Biotin accessible                                                     | yes                                              |
|                   | I327                                                                         | MTSEA-Biotin accessible                                                     | yes                                              |
|                   | A331                                                                         | MTSEA-Biotin accessible                                                     | yes                                              |
|                   | I333                                                                         | MTSEA-Biotin accessible, may distinguish between 5HT and MDMA               | no; orientated towards TM2                       |
|                   | F334                                                                         | MTSEA-Biotin accessible                                                     | yes                                              |
|                   | F335                                                                         | MTSEA-Biotin accessible                                                     | yes                                              |
|                   | S336                                                                         | MTSEA-Biotin accessible, coordination of Na, Cl, 5HT; opposed to N101       | yes                                              |
|                   | G338                                                                         | domain movement - no function when mutated                                  | located in unwound region                        |
|                   | G342                                                                         | domain movement - no function when mutated                                  | located in unwound region                        |
| F347              | MTSEA-Biotin accessible                                                      | no; below central binding site                                              |                                                  |
| Forrest et al.    | Y95                                                                          | accessible from both sides of the membrane                                  | not in our 'open-to-out' model                   |
|                   | G442                                                                         | not accessible; part of the central binding site                            | yes                                              |
|                   | L443                                                                         | not accessible; part of the central binding site                            | yes                                              |
| Henry et al. 2003 | D98                                                                          | accessible, protected by 5HT                                                | yes                                              |
|                   | G100                                                                         | accessible, protected by 5HT and Cocaine                                    | yes                                              |
|                   | N101                                                                         | accessible, protected by 5HT and Cocaine                                    | partly                                           |
|                   | W103                                                                         | not well accessible                                                         | yes                                              |
|                   | Y107                                                                         | accessible, protected by 5HT                                                | partly, on the extracellular end of the helix    |
|                   | I108                                                                         | accessible                                                                  | yes                                              |
| Henry et al. 2006 | Y95C/I172C                                                                   | no Cd <sup>++</sup> binding site; too distant                               | yes                                              |
|                   | N101C/I179C                                                                  | Cd <sup>++</sup> binding site; close enough                                 | no, too distant                                  |
|                   | I172                                                                         | located in the central binding site; involved in ligand binding             | yes                                              |
|                   | I179                                                                         | indirectly involved in ligand binding                                       | yes                                              |
| White et al.      | V102C/D98                                                                    | Zn <sup>++</sup> binding site                                               | partly; both residues are in proximity           |
|                   | V102C/M180C                                                                  | inhibited by MTS-3-MTS; suggesting a distance of 5 to 6.5 Å                 | orientation matches; distance larger             |
|                   | V102C/A183C                                                                  | disulphide bond                                                             | orientation matches; distance larger             |
|                   | W103H/M180C                                                                  | sensitive for Zn <sup>++</sup> inhibition; not W103C/M180C (too distant)    | orientation matches; distance larger             |
|                   | Distances (in Å) between the mentioned residues in the model of White et al. |                                                                             | distances measured from Cβ in our model          |
|                   | V102-I179                                                                    | 8,5                                                                         | 13,3                                             |
|                   | V102-M180                                                                    | 8,6                                                                         | 13,6                                             |
|                   | V102-A181                                                                    | n.d. - opposite side of the helix                                           | opposite side of the helix                       |
|                   | V102-W182                                                                    | 9,9                                                                         | 14,1                                             |
|                   | V102-V183                                                                    | 7,5                                                                         | 11,7                                             |
|                   | V102-L184                                                                    | n.d. - opposite side of the helix                                           | opposite side of the helix                       |

The homology model of hSERT was validated with mutagenesis studies. Concerning the location and orientation of residues important for ligand binding, most of the criteria are fulfilled.

Supplementary Table 2: Interactions of the docking poses of imipramine with residues of hSERT

| Domain | Interacting Residue | Number of Hits | Type of Main Interaction | Number of Hits |
|--------|---------------------|----------------|--------------------------|----------------|
| TM1    | Y95*                | 82             | contact                  | Y95*           |
|        | A96*                | 4              | backbone donor           | A96*           |
|        | D98*                | 28             | ionic                    | D98*           |
|        | L99*                | 0              |                          | L99*           |
|        | G100*               | 0              |                          | G100*          |
|        | R104*               | 218            | contact                  | R104*          |
|        | Y107                | 31             | contact                  | Y107           |
| TM3    | A169*               | 0              |                          | A169*          |
|        | I172*               | 0              |                          | I172*          |
|        | A173*               | 0              |                          | A173*          |
|        | Y175*               | 54             | sidechain donor          | Y175*          |
|        | Y176*               | 6              | sidechain donor          | Y176*          |
|        | I179*               | 243            | contact                  | I179*          |
|        | W182                | 215            | contact                  | W182           |
| EL2    | A183                | 27             | contact                  | A183           |
|        | Y232                | 48             | contact                  | Y232           |
| TM6    | Q238                | 5              | contact                  | Q238           |
|        | D328                | 34             | contact                  | D328           |
|        | F335*               | 50             | contact                  | F335*          |
|        | S336*               | 3              | backbone donor           | S336*          |
|        | L337*               | 0              |                          | L337*          |
|        | G338*               | 0              |                          | G338*          |
|        | F341*               | 2              | backbone donor           | F341*          |
| EL4    | V343*               | 0              |                          | V343*          |
|        | P403                | 209            | contact                  | P403           |
| TM8    | S438*               | 5              | backbone donor           | S438*          |
|        | T439*               | 0              |                          | T439*          |
|        | G442*               | 78             | contact                  | G442*          |
|        | L443*               | 0              |                          | L443*          |
| EL5    | A486                | 5              | contact                  | A486           |
| TM10   | V489                | 10             | contact                  | V489           |
|        | K490                | 118            | contact                  | K490           |
|        | E493*               | 454            | contact                  | E493*          |
|        | E494                | 73             | ionic                    | E494           |
|        | T497*               | 7              | sidechain donor          | T497*          |
|        | G498*               | 0              |                          | G498*          |
|        | P499                | 26             | contact                  | P499           |
|        | V501*               | 0              |                          | V501*          |
|        | L502                | 12             | contact                  | L502           |
| TM11   | F556                | 20             | contact                  | F556           |
|        | Y563                | 6              | contact                  | Y563           |
|        | Y568                | 4              | contact                  | Y568           |
|        | Na <sub>1</sub> *   | 0              |                          |                |

Amount and the type of the most frequent populated interactions of imipramine with residues of hSERT. The docking algorithm prefers placements in the extracellular vestibule near E493 and I179. Residues marked with an asterisk have been part of the defined binding site for docking.

Supplementary Table 3: Interactions of poses in group 3

| Pose | Residue |        |               |               |               |       |
|------|---------|--------|---------------|---------------|---------------|-------|
|      | D98     | Y175   | Y176          | F335          | K490          | E493  |
| 1    | ionic   |        | $\pi$ -cation |               |               |       |
| 2*   | ionic   |        | $\pi$ -cation | $\pi$ -cation | $\pi$ -cation |       |
| 3    | ionic   |        |               |               |               |       |
| 4    |         | H-bond |               |               |               | ionic |
| 5    | ionic   |        |               |               | $\pi$ -cation |       |
| 6    | ionic   |        |               | $\pi$ -cation | $\pi$ -cation |       |
| 7    | ionic   |        | $\pi$ -cation |               |               |       |

The type of interactions of the docking poses in group 3 with residues of the homology model of hSERT were obtained by the function 'Ligand Interactions' implemented in MOE. (\*)Docking pose 2 as the top scored one of this group was finally selected as representative.
